# Supplementary material for: Carbon quantum dots directly generated from electrochemical oxidation of graphite electrodes in alkaline alcohols and the applications for specific ferric ion detection and cell imaging
Source: Royal Society of Chemistry journal article supplement (doi:10.1039/c5an02231b), 2016-01-01
Supplement: c5an02231b1.pdf [file c5an02231b1.pdf]

## Supporting Information for:

### **Carbon quantum dots directly generated from electrochemical oxidation of graphite electrode in alkaline alcohols and the applications for specific ferric ion detection and cell imaging**

Mengli Liu<sup>1,a</sup>, Yuanhong Xu<sup>1,a</sup>, Fushuang Niu<sup>a</sup>, J. Justin Gooding<sup>b\*</sup>, Jingquan Liu<sup>a\*</sup>

<sup>a</sup> *College of Materials Science and Engineering; Laboratory of Fiber Materials and Modern Textile, the Growing Base for State Key Laboratory; Collaborative Innovation Center for Marine Biomass Fibers, Materials and Textiles of Shandong Province; Qingdao University, Qingdao 266071, China*

<sup>b</sup> *School of Chemistry, The University of New South Wales, Sydney, NSW 2052, Australia*

\* Author for Correspondence: Prof. Dr. Jingquan Liu and J. Justin Gooding

E-Mail: [jliu@qdu.edu.cn](mailto:jliu@qdu.edu.cn) (J.L. Liu) and [justin.gooding@unsw.edu.au](mailto:justin.gooding@unsw.edu.au) (J.J. Gooding)

Fax: +86 532 83780128; Tel: +86 532 83780128

<sup>1</sup>Mengli Liu and Yuanhong Xu contribute equally to this work.

## Experimental

Atomic absorption spectrophotometer (AAS) equipped with hollow cathode lamp (HCL) was used for iron determination. The optimum conditions for AAS were applied as follow: wavelength 248.3 nm; HCL current 10 mA; acetylene flow rate 0.5 L/min; air flow rate 4.0 L/min; slit width 0.2 nm.

After the acid pretreatment by **hydrochloric** acid, iron ( $\text{Fe}^{3+}$ ) at different concentrations (0, 10, 20, 30 and 40  $\mu\text{M}$ ) was spiked into the tap water, respectively. The spiked water samples were determined by AAS method under the above analytical conditions. Concentrations of  $\text{Fe}^{3+}$  were calculated by the standard curve method [S1].

[S1] M. Yaman, G. Kaya, *Anal. Chim. Acta.*,2005, **540**, 77-81.

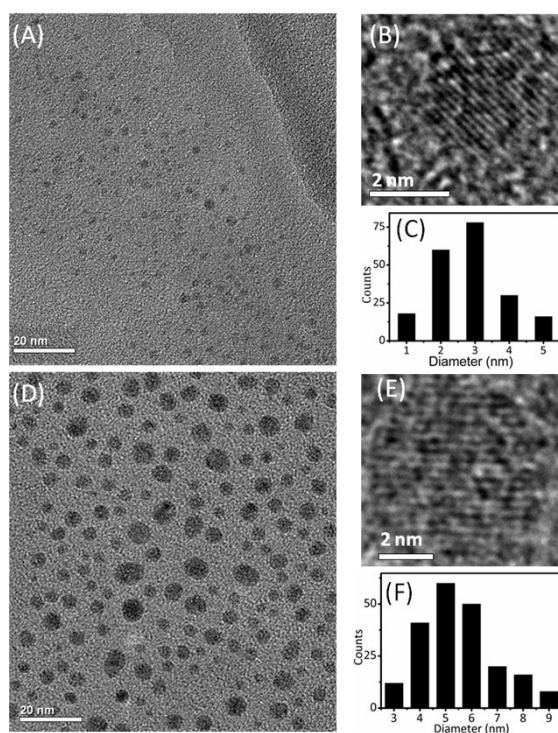

**Fig. S1** (A, D) TEM and (B, E) HRTEM images as well as (C, F) size distribution of the colourless CQDs obtained from the potentials of 3 V and 7 V, respectively.

**Table S1.** Comparison of the working conditions, quantum yield and characteristics of different EC methods for CQDs generation.

| Working electrode                                   | Electrolyte                                                  | Voltage   | Time  | Quantum yield | Advantages and disadvantages                                                                                                                                                    | References |
|-----------------------------------------------------|--------------------------------------------------------------|-----------|-------|---------------|---------------------------------------------------------------------------------------------------------------------------------------------------------------------------------|------------|
| Graphite electrode                                  | NaOH/ ethanol/H <sub>2</sub> O                               | 5 V       | 3 h   | 10.8 %        | Green, low cost, good reproducibility, but it needed relatively longer time.                                                                                                    | this work  |
| 3D Graphene                                         | Ionic liquid (IL) BMIMPF <sub>6</sub> in acetonitrile        | 5 V       | 100 s | /             | Shorter time was required for synthesis, but high-cost carbon source was needed.                                                                                                | 48         |
| Carbon fibers                                       | acetonitrile containing 0.1 M tetrabutylammonium perchlorate | 0.5-2.5 V | 2 h   | /             | Size-selective preparation of C-dots can be achieved only by adjusting the applied potentials, but the used electrolyte is not environment-friendly.                            | 2          |
| Graphite rods                                       | IL [apmim][BF <sub>4</sub> ] and water                       | 12 V      | 4 h   | 11.3 %        | IL functionalized carbon nanodots were synthesized, but the IL is relatively high-cost                                                                                          | 38         |
| Graphite rods                                       | Ultrapure water                                              | 15-60 V   | 120 h | /             | Facile, additive-free, but it needed longer time and higher potentials.                                                                                                         | 7          |
| Carbon paste electrodes with different compositions | 0.1M NaH <sub>2</sub> PO <sub>4</sub> aqueous solution       | 9 V       | 6 h   | /             | Shifting and non-shifting fluorescence emissions were observed by changing the compositions of the parent Electrodes, but relatively higher voltage and longer time were needed | 33         |

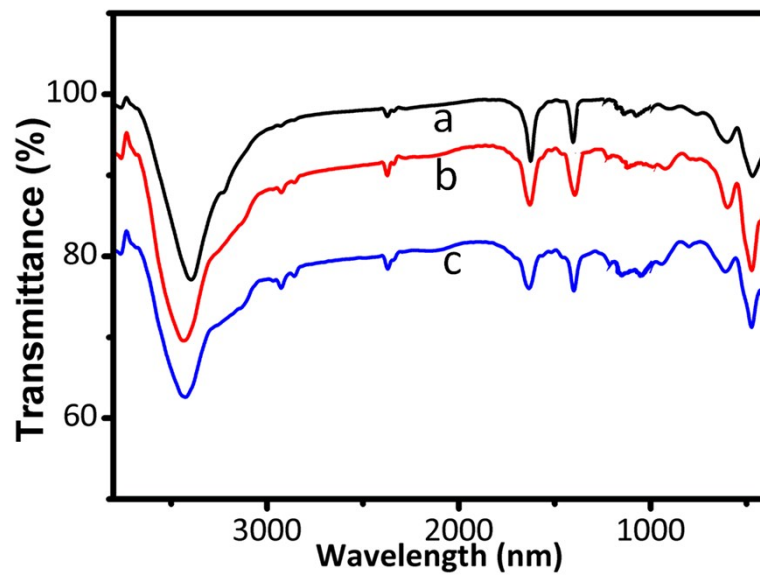

**Fig. S2** The FTIR spectra for CQDs upon addition with ions of (a)  $\text{Cu}^{2+}$ , (b)  $\text{Cd}^{2+}$  and (c)  $\text{Ni}^{2+}$ .
